# Supplementary material for: Prolonged wait time is associated with increased mortality for Chilean waiting list patients with non-prioritized conditions
Source: BMC Public Health. 2019 Feb 26;19:233. doi: 10.1186/s12889-019-6526-6 (PMC6390314; doi:10.1186/s12889-019-6526-6)
Supplement: Supplementary file 1 — Extension and Robustness of Main Results. (PDF 1480 kb) [file 12889_2019_6526_MOESM1_ESM.pdf]

# Prolonged Wait Time is Associated with Increased Mortality for Chilean Waiting List Patients with Non-Prioritized Conditions

Diego A. Martinez, PhD,<sup>1</sup> Haoxiang Zhang, MSc,<sup>1</sup> Magdalena Bastias, PhD,<sup>2</sup> Felipe Feijoo,<sup>3</sup> PhD,  
Jeremiah Hinson, MD, PhD,<sup>1</sup> Rodrigo Martinez, MD,<sup>2</sup> Jocelyn Dunstan,<sup>2</sup> PhD,  
Scott Levin, PhD,<sup>1</sup> Diana Prieto, PhD<sup>1</sup>

<sup>1</sup>Johns Hopkins University

<sup>2</sup>University of Chile

<sup>3</sup>Pontifical Catholic University of Valparaíso

## Additional File 1: Extension and Robustness of Main Results

### Contents

|                                                                 |           |
|-----------------------------------------------------------------|-----------|
| <b>Robustness of Main Results .....</b>                         | <b>2</b>  |
| Survival Analysis on Oncology .....                             | 2         |
| Survival Analysis on 2-, 2.5-, and 3-Year Mortality .....       | 8         |
| Correlation Analysis by Level of Care .....                     | 10        |
| Correlation Analysis for High-Risk Medical Specialties .....    | 11        |
| <b>Extensions to Main Analysis .....</b>                        | <b>12</b> |
| Methodological Justification of the Selected Study Design ..... | 12        |
| <b>Extra Data Visualizations .....</b>                          | <b>13</b> |
| Age- and Sex-Adjusted Mortality Rate .....                      | 13        |
| Specialty- and Sex-Adjusted Mortality Rates .....               | 16        |
| Death-Adjusted Waiting Time Distribution .....                  | 17        |
| <b>Policy Timeline.....</b>                                     | <b>20</b> |
| Health Problems Prioritized by the GES Act .....                | 20        |
| <b>Data Collection and Analysis.....</b>                        | <b>21</b> |

## ROBUSTNESS OF MAIN RESULTS

### Survival Analysis on Oncology

It is possible that our effects are driven by a set of few high-mortality medical specialties. We examine this possibility by restricting our sample to those registrants waiting for a high-mortality medical specialty: Oncology. Table S1 shows all variables included into the final model are statistically significant. Table S2 shows the HR associated with 2-year death since registration. Kaplan Meier estimator and Cox proportional model are depicted in Figure S1 and S2. While the confidence intervals are wider throughout due to the smaller sample size, the main patterns remain.

**Table S1. ANOVA Analysis for Mortality Within 2 Years of Listing According to Covariates for Oncology specialty.**

|                                | <i>loglik</i> | <i>Chisq</i> | <i>df</i> | <i>Pr(&gt; Chi )</i> |     |
|--------------------------------|---------------|--------------|-----------|----------------------|-----|
| NULL                           | -18771        |              |           |                      |     |
| Age                            | -18619        | 304.7032     | 5         | < 2.2e-16            | *** |
| Sex                            | -18592        | 54.6891      | 1         | 1.412E-13            | *** |
| Residence                      | -18532        | 118.9046     | 2         | < 2.2e-16            | *** |
| Health Service                 | -18487        | 90.0868      | 2         | < 2.2e-16            | *** |
| Referring Medical Center       | -18530        | 5.1341       | 1         | 0.023460             | *   |
| Age : Sex                      | -18482        | 9.9105       | 5         | 7.78E-02             | .   |
| Age : Residence                | -18472        | 19.7244      | 10        | 3.20E-02             | *   |
| Age : Health Service           | -18451        | 43.3013      | 10        | 4.39E-06             | *** |
| Sex : Health Service           | -18444        | 12.7144      | 6         | 4.78E-02             | *   |
| Age : Referring Medical Center | -18438        | 12.1335      | 2         | 2.32E-03             | **  |

\*\*\*Significant at the 0.1% level, \*\* Significant at the 1% level, \*Significant at the 5% level.

**Table S2. Hazard Risk for Mortality Within 2 Years of Listing According to Covariates: Oncology Patient Cohort.**

|                                                           | <b>N</b> | <b>HR (95% CI)</b>     |
|-----------------------------------------------------------|----------|------------------------|
| <b>Age (reference level 85+)</b>                          |          |                        |
| 15-45                                                     | 827      | 0.017 (0.002-0.143)*** |
| 46-55                                                     | 942      | 0.017 (0.002-0.122)*** |
| 56-65                                                     | 1286     | 0.049 (0.009-0.273)*** |
| 66-75                                                     | 1476     | 0.145 (0.029-0.732)*   |
| 76-85                                                     | 863      | 0.256 (0.047-1.383)    |
| <b>Sex (reference level female)</b>                       |          |                        |
| Male                                                      | 2335     | 1.334 (0.926-1.920)    |
| <b>Residence (reference level urban)</b>                  |          |                        |
| other                                                     | 1818     | 0.387 (0.114-1.313)    |
| rural                                                     | 80       | 1.691 (0.373-7.664)    |
| <b>Health Service (reference level Atacama)</b>           |          |                        |
| Atacama                                                   | 1003     | 0.116 (0.033-0.411)*** |
| Vaparaíso-SanAntonio                                      | 2975     | 0.214 (0.060-0.767)*   |
| <b>Referring Medical Center (reference level primary)</b> |          |                        |
| Tertiary                                                  | 5459     | 0.509 (0.270-0.959)*   |
| <b>Age : Sex</b>                                          |          |                        |
| 15-45:Male                                                | 288      | 0.653 (0.409-1.043).   |
| 46-55:Male                                                | 310      | 0.990 (0.644-1.522)    |
| 56-65:Male                                                | 506      | 1.019 (0.683-1.520)    |
| 66-75:Male                                                | 741      | 1.022 (0.690-1.514)    |
| 76-85:Male                                                | 420      | 0.740 (0.495-1.106)    |
| <b>Age : Residency</b>                                    |          |                        |
| 15-45:other                                               | 240      | 3.885 (0.789-19.118).  |
| 46-55:other                                               | 267      | 3.863 (1.018-14.662)*  |
| 56-65:other                                               | 387      | 3.455 (0.928-12.858).  |
| 66-75:other                                               | 480      | 2.897 (0.795-10.564)   |
| 76-85:other                                               | 339      | 2.619 (0.667-10.288)   |
| 15-45:rural                                               | 3        | 2.082 (0.151-28.605)   |
| 46-55:rural                                               | 15       | 0.852 (0.139-5.226)    |
| 56-65:rural                                               | 16       | 0.498 (0.086-2.877)    |
| 66-75:rural                                               | 23       | 0.198 (0.033-1.201).   |
| 76-85:rural                                               | 21       | 0.458 (0.084-2.489)    |
| <b>Age : Health Service</b>                               |          |                        |
| 15-45:Atacama                                             | 165      | 1.499 (0.272-8.266)    |
| 46-55:Atacama                                             | 190      | 3.070 (0.754-12.504)   |

|                                       |      |                        |
|---------------------------------------|------|------------------------|
| 56-65:Atacama                         | 200  | 4.186 (1.083-16.180)*  |
| 66-75:Atacama                         | 250  | 3.643 (0.966-13.735).  |
| 76-85:Atacama                         | 160  | 2.142 (0.527-8.702)    |
| 15-45:Vaparaíso-SanAntonio            | 444  | 7.309 (1.409-37.927)*  |
| 46-55:Vaparaíso-SanAntonio            | 534  | 6.241 (1.550-25.126)** |
| 56-65:Vaparaíso-SanAntonio            | 744  | 4.404 (1.122-17.293)*  |
| 66-75:Vaparaíso-SanAntonio            | 802  | 3.026 (0.787-11.638)   |
| 76-85:Vaparaíso-SanAntonio            | 391  | 2.103 (0.509-8.686)    |
| <b>Age : Referring Medical Center</b> |      |                        |
| 15-45:tertiary                        | 810  | 3.293 (0.890-12.188).  |
| 46-55:tertiary                        | 926  | 4.351 (1.181-16.026)*  |
| 56-65:tertiary                        | 1266 | 2.340 (0.909-6.019).   |
| 66-75:tertiary                        | 1442 | 1.109 (0.519-2.370)    |
| 76-85:tertiary                        | 834  | 1.307 (0.600-2.847)    |
| <b>Sex : Health Service</b>           |      |                        |
| Male:Atacama                          | 387  | 1.627 (1.206-2.195)**  |
| Male:Vaparaíso-SanAntonio             | 1236 | 1.101 (0.916-1.324)    |

\*\*\*Significant at the 0.1% level, \*\* Significant at the 1% level, \*Significant at the 5% level.

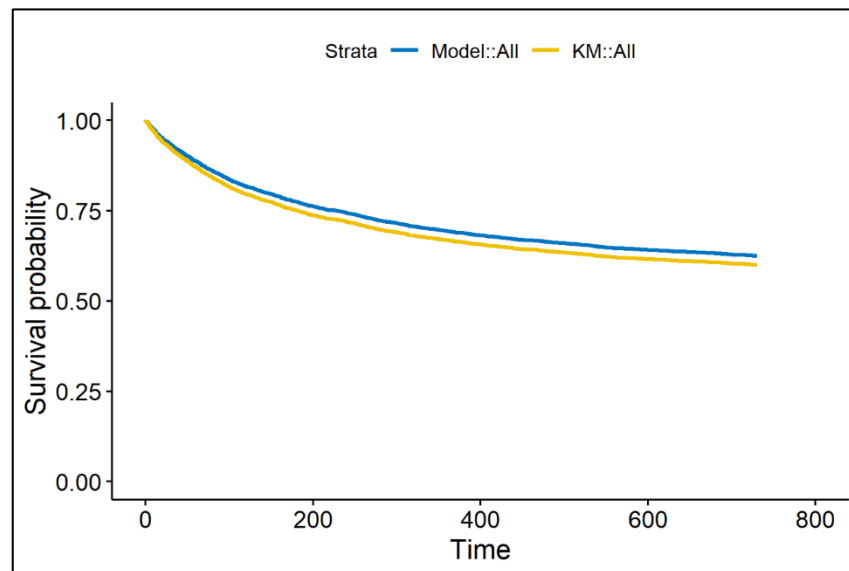

**Figure S1. Kaplan Meier curve estimator (yellow) and Cox proportional model (blue) fitted to Oncology specialty. Time in calendar days.**

**A**

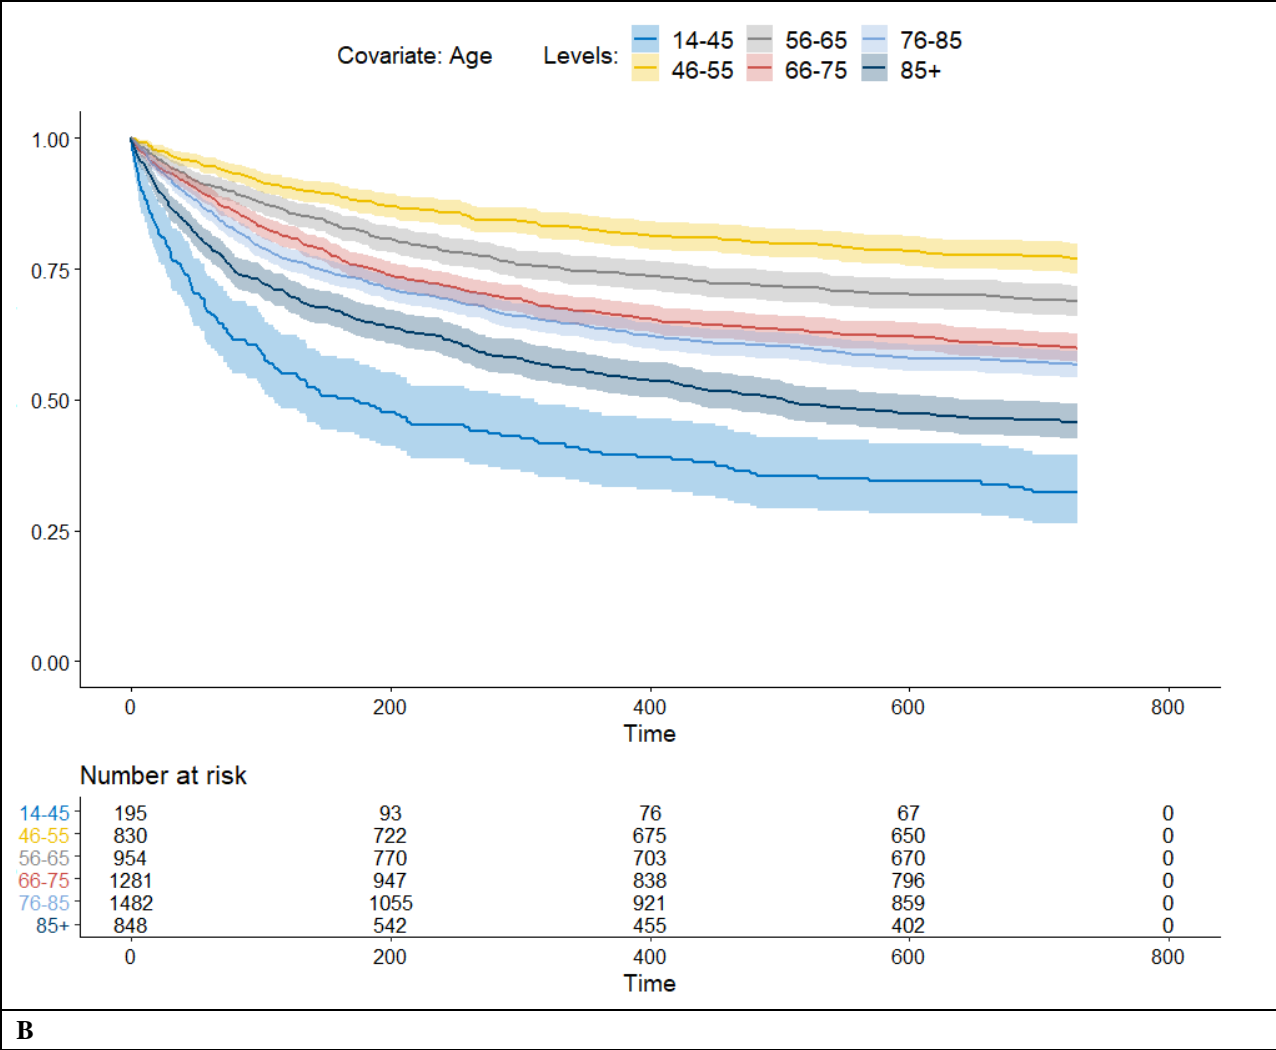

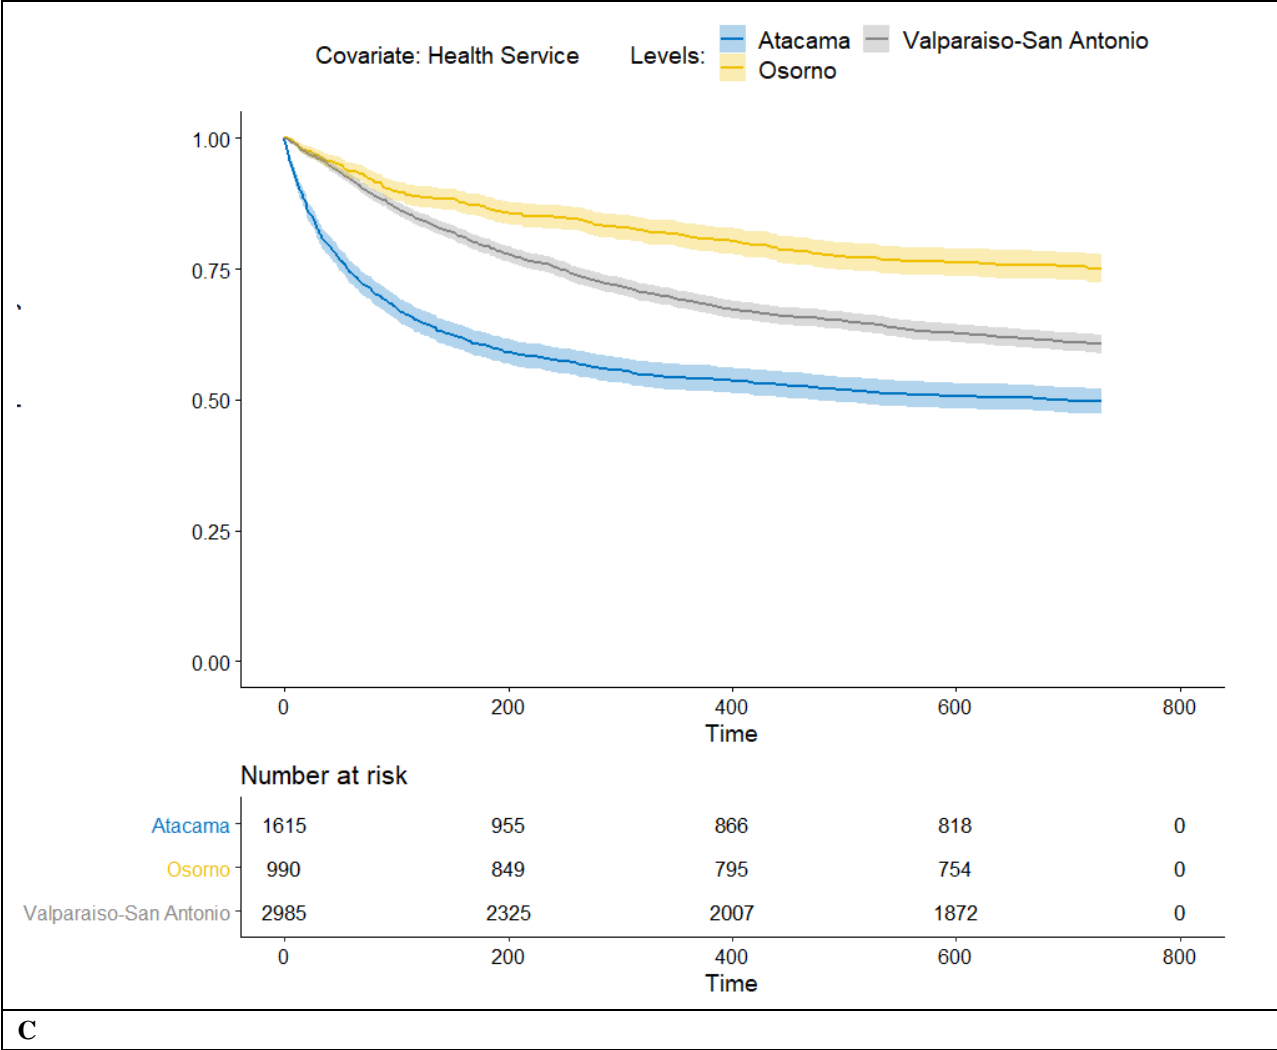

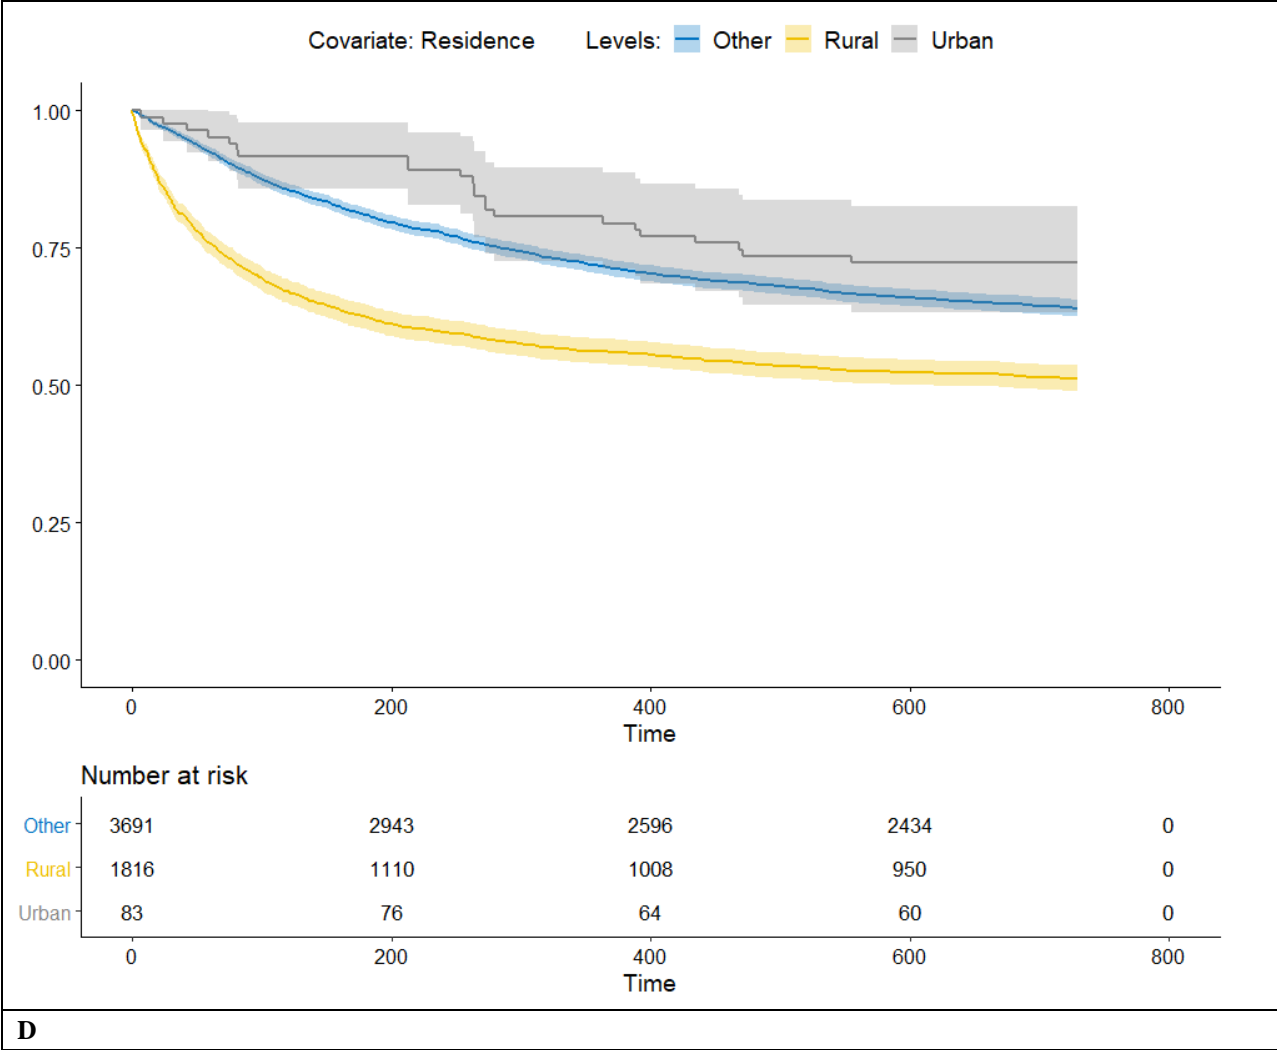

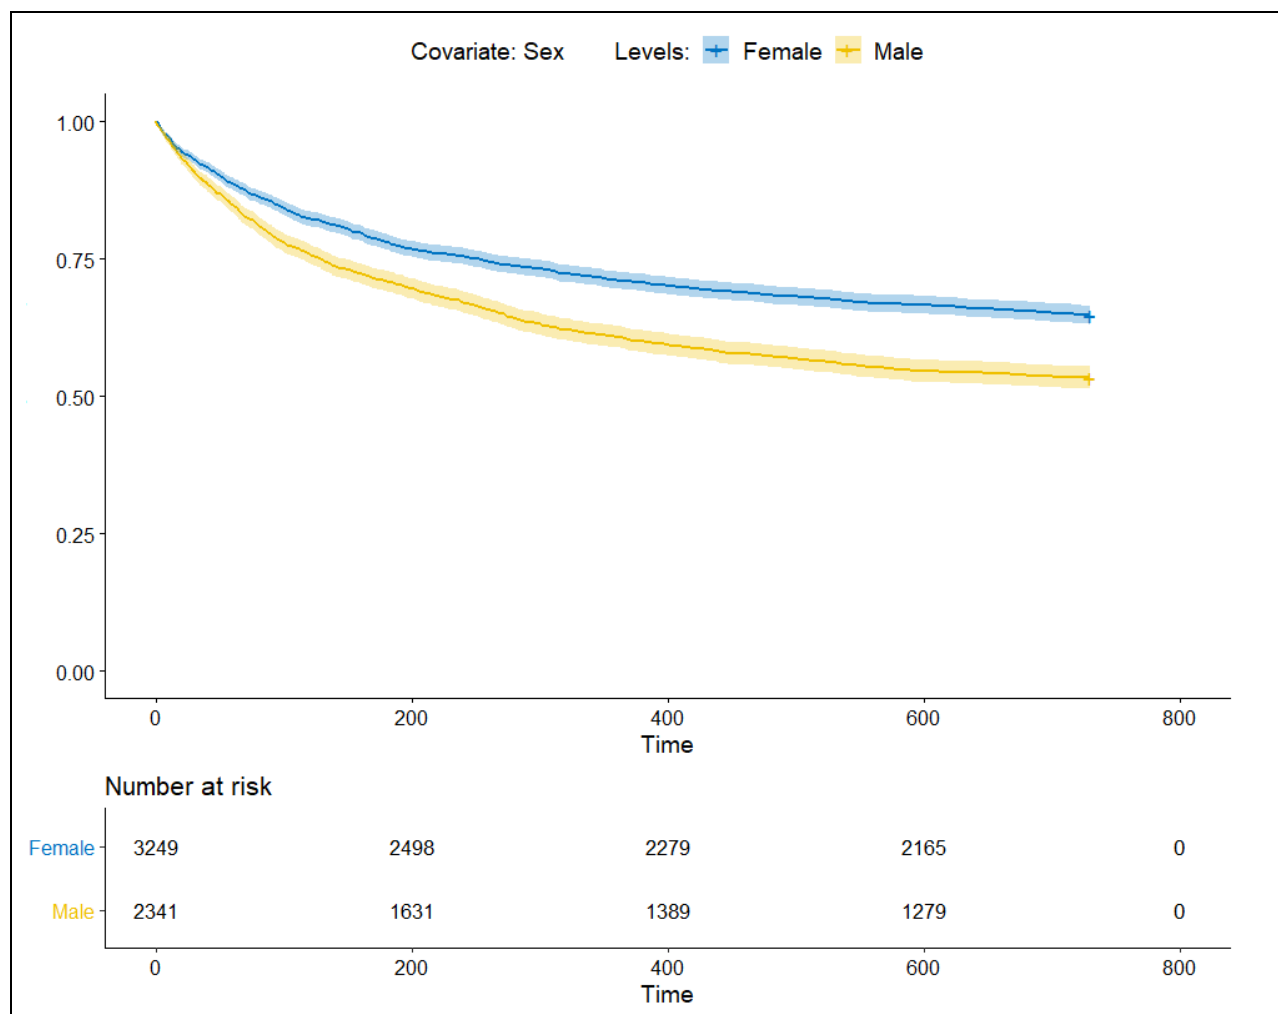

**Figure S2. Kaplan Meier curve estimators for Oncology specialty model's covariates. Panel A by age group, panel B by Regional Health Service, panel C by patient's residence, and panel D by sex. Time in calendar days.**

# Survival Analysis on 2-, 2.5-, and 3-Year Mortality

It is possible that our effects are underestimated due to our main outcome defined as 2-year mortality. We investigate further by re-defining our outcome and estimating odds ratios for each of the covariates under study. Table S3 below present the hazard ratio for mortality within 2, 2.5, and 3 years of listing. The main patterns presented and discussed in the main manuscript remain.

**Table S3. Hazard Risk Comparison for Mortality Within 2, 2.5, and 3 Years of Listing According to Covariates.**

|                                          | N (%)        | Overall 2 Year Mortality†<br>HR (95% CI) | Overall 2.5 Year Mortality†<br>HR (95% CI) | Overall 3 Year Mortality†<br>HR (95% CI) |
|------------------------------------------|--------------|------------------------------------------|--------------------------------------------|------------------------------------------|
| Age (15 to 45 comparator)                |              |                                          |                                            |                                          |
| 0 to 3                                   | 68,028 (7)   | 0.76 (0.69 to 0.84)***                   | 0.73 (0.66 to 0.8)***                      | 0.7 (0.64 to 0.77)***                    |
| 4 to 7                                   | 53,865 (5)   | 0.16 (0.12 to 0.2)***                    | 0.16 (0.13 to 0.2)***                      | 0.15 (0.12 to 0.19)***                   |
| 8 to 11                                  | 43,053 (4)   | 0.1 (0.07 to 0.14)***                    | 0.1 (0.08 to 0.14)***                      | 0.12 (0.09 to 0.15)***                   |
| 12 to 14                                 | 35,723 (4)   | 0.18 (0.14 to 0.24)***                   | 0.19 (0.14 to 0.24)***                     | 0.2 (0.16 to 0.26)***                    |
| 15 to 45                                 | 293,892 (30) |                                          |                                            |                                          |
| 46 to 55                                 | 146,814 (15) | 2.88 (2.72 to 3.05)***                   | 2.88 (2.73 to 3.05)***                     | 2.93 (2.78 to 3.09)***                   |
| 56 to 65                                 | 139,099 (14) | 5.47 (5.19 to 5.76)***                   | 5.54 (5.27 to 5.82)***                     | 5.67 (5.41 to 5.94)***                   |
| 66 to 75                                 | 122,319 (12) | 9.11 (8.66 to 9.57)***                   | 9.41 (8.98 to 9.87)***                     | 9.76 (9.33 to 10.21)***                  |
| 76 to 85                                 | 70,835 (7)   | 16.11 (15.32 to 16.94)***                | 16.95 (16.16 to 17.77)***                  | 17.63 (16.85 to 18.44)***                |
| 85+                                      | 13,869 (1)   | 31.77 (30.01 to 33.63)***                | 32.95 (31.22 to 34.77)***                  | 34.22 (32.5 to 36.02)***                 |
| Sex (Female comparator)                  |              |                                          |                                            |                                          |
| Female                                   | 613,499 (62) |                                          |                                            |                                          |
| Male                                     | 373,998 (38) | 1.65 (1.61 to 1.69)***                   | 1.64 (1.6 to 1.67)***                      | 1.63 (1.6 to 1.66)***                    |
| Residence (Other comparator)             |              |                                          |                                            |                                          |
| Rural                                    | 20,271 (2)   |                                          |                                            |                                          |
| Other                                    | 320,563 (32) | 1.72 (1.56 to 1.89)***                   | 1.68 (1.53 to 1.84)***                     | 1.62 (1.49 to 1.76)***                   |
| Urban                                    | 646,663 (65) | 1.19 (1.09 to 1.31)***                   | 1.18 (1.08 to 1.28)***                     | 1.14 (1.05 to 1.23)**                    |
| Health Service (Atacama comparator)      |              |                                          |                                            |                                          |
| Atacama                                  | 264,756 (27) |                                          |                                            |                                          |
| Osorno                                   | 457,928 (46) | Std Dev=0.02                             | Std Dev=0.02                               | Std Dev=0.02                             |
| Valparaiso-San Antonio                   | 264,813 (27) |                                          |                                            |                                          |
| Health Insurance (Public comparator)     |              |                                          |                                            |                                          |
| Public                                   | 979,666 (99) |                                          |                                            |                                          |
| Other (Private, Military)                | 7,831 (1)    | 0.85 (0.73 to 0.99)*                     | 0.84 (0.73 to 0.97)*                       | 0.84 (0.73 to 0.97)*                     |
| Specialty (Internal Medicine comparator) |              |                                          |                                            |                                          |
| Internal Medicine                        | 46,767 (5)   |                                          |                                            |                                          |
| Adult Surgery                            | 71,148 (7)   | 0.67 (0.64 to 0.7)***                    | 0.68 (0.65 to 0.71)***                     | 0.68 (0.66 to 0.71)***                   |
| Anesthesiology                           | 3,978 (0)    | 0.38 (0.33 to 0.44)***                   | 0.39 (0.34 to 0.45)***                     | 0.4 (0.36 to 0.46)***                    |
| Breast Surgery                           | 1,478 (0)    | 0.55 (0.39 to 0.77)***                   | 0.62 (0.46 to 0.84)**                      | 0.68 (0.51 to 0.89)**                    |
| Bronchopulmonary                         | 17,427 (2)   | 1.17 (1.1 to 1.24)***                    | 1.19 (1.12 to 1.26)***                     | 1.19 (1.13 to 1.25)***                   |
| Cardiology                               | 31,480 (3)   | 0.66 (0.63 to 0.7)***                    | 0.69 (0.65 to 0.72)***                     | 0.71 (0.67 to 0.74)***                   |
| Cardiovascular Surgery                   | 15,197 (2)   | 0.63 (0.58 to 0.68)***                   | 0.67 (0.63 to 0.72)***                     | 0.68 (0.64 to 0.73)***                   |
| Dentistry                                | 128,505 (13) | 0.33 (0.31 to 0.36)***                   | 0.34 (0.32 to 0.37)***                     | 0.36 (0.33 to 0.38)***                   |
| Dermatology                              | 28,987 (3)   | 0.42 (0.38 to 0.46)***                   | 0.44 (0.4 to 0.48)***                      | 0.45 (0.42 to 0.49)***                   |
| Endocrinology                            | 17,854 (2)   | 0.43 (0.39 to 0.49)***                   | 0.48 (0.44 to 0.54)***                     | 0.5 (0.46 to 0.55)***                    |
| Family Medicine                          | 150 (0)      | 0.19 (0.03 to 1.32)                      | 0.33 (0.08 to 1.31)                        | 0.44 (0.14 to 1.37)                      |
| Gastroenterology                         | 25,745 (3)   | 1.03 (0.98 to 1.09)                      | 1.03 (0.97 to 1.08)                        | 1.01 (0.96 to 1.06)                      |
| Genetics                                 | 3,348 (0)    | 0.64 (0.46 to 0.89)**                    | 0.68 (0.5 to 0.91)*                        | 0.66 (0.5 to 0.89)**                     |

|                                               |              |                        |                        |                        |
|-----------------------------------------------|--------------|------------------------|------------------------|------------------------|
| Hematology                                    | 5,868 (1)    | 1.6 (1.49 to 1.73)***  | 1.61 (1.5 to 1.73)***  | 1.58 (1.47 to 1.7)***  |
| Infectious Disease                            | 3,304 (0)    | 0.86 (0.7 to 1.05)     | 0.89 (0.74 to 1.08)    | 0.92 (0.77 to 1.1)     |
| Maxillofacial Surgery                         | 18,140 (2)   | 0.37 (0.31 to 0.43)*** | 0.36 (0.31 to 0.42)*** | 0.36 (0.31 to 0.42)*** |
| Neonatology                                   | 282 (0)      | 1.61 (0.84 to 3.12)    | 1.58 (0.82 to 3.05)    | 1.55 (0.8 to 2.99)     |
| Nephrology                                    | 11,208 (1)   | 1.02 (0.96 to 1.1)     | 1.06 (1 to 1.13)       | 1.08 (1.01 to 1.15)*   |
| Neurology                                     | 47,087 (5)   | 0.82 (0.78 to 0.86)*** | 0.84 (0.8 to 0.89)***  | 0.85 (0.81 to 0.89)*** |
| Neurosurgery                                  | 15,238 (2)   | 0.5 (0.46 to 0.55)***  | 0.51 (0.47 to 0.56)*** | 0.5 (0.46 to 0.55)***  |
| Nutrition                                     | 1,856 (0)    | 2.16 (1.81 to 2.57)*** | 2.2 (1.86 to 2.6)***   | 2.2 (1.87 to 2.59)***  |
| Obstetrics & Gynecology                       | 93,979 (10)  | 0.42 (0.39 to 0.45)*** | 0.43 (0.4 to 0.46)***  | 0.44 (0.41 to 0.47)*** |
| Oncology                                      | 6,080 (1)    | 3.57 (3.4 to 3.76)***  | 3.5 (3.33 to 3.67)***  | 3.37 (3.21 to 3.54)*** |
| Ophthalmology                                 | 113,848 (12) | 0.34 (0.32 to 0.36)*** | 0.38 (0.36 to 0.39)*** | 0.4 (0.38 to 0.41)***  |
| Other                                         | 781 (0)      | 1.04 (0.76 to 1.44)    | 1.09 (0.81 to 1.47)    | 0.99 (0.73 to 1.34)    |
| Otorhinolaryngology                           | 67,646 (7)   | 0.43 (0.4 to 0.45)***  | 0.45 (0.43 to 0.47)*** | 0.47 (0.44 to 0.49)*** |
| Pediatrics                                    | 18,177 (2)   | 0.41 (0.31 to 0.54)*** | 0.45 (0.35 to 0.58)*** | 0.46 (0.37 to 0.59)*** |
| Physical Medicine & Rehabilitation            | 10,429 (1)   | 0.59 (0.53 to 0.65)*** | 0.62 (0.56 to 0.68)*** | 0.64 (0.58 to 0.7)***  |
| Plastic Surgery                               | 1,858 (0)    | 0.53 (0.43 to 0.67)*** | 0.56 (0.46 to 0.69)*** | 0.56 (0.46 to 0.69)*** |
| Colorectal Surgery                            | 3,114 (0)    | 0.57 (0.47 to 0.69)*** | 0.59 (0.49 to 0.7)***  | 0.57 (0.48 to 0.67)*** |
| Psychiatry                                    | 13,135 (1)   | 0.74 (0.65 to 0.85)*** | 0.82 (0.73 to 0.93)**  | 0.86 (0.77 to 0.96)**  |
| Rheumatology                                  | 7,341 (1)    | 0.4 (0.35 to 0.47)***  | 0.42 (0.36 to 0.47)*** | 0.42 (0.38 to 0.48)*** |
| Sexual Transmitted Disease                    | 1,807 (0)    | 0.3 (0.17 to 0.53)***  | 0.34 (0.2 to 0.56)***  | 0.33 (0.2 to 0.54)***  |
| Traumatology                                  | 107,111 (11) | 0.34 (0.32 to 0.36)*** | 0.37 (0.35 to 0.39)*** | 0.39 (0.37 to 0.4)***  |
| Urology                                       | 47,102 (5)   | 0.58 (0.55 to 0.61)*** | 0.59 (0.56 to 0.62)*** | 0.6 (0.57 to 0.62)***  |
| Referring Medical Center (Primary comparator) |              |                        |                        |                        |
| Primary                                       | 463,119 (47) |                        |                        |                        |
| Secondary                                     | 3,455 (0)    | 0.74 (0.52 to 1.04)    | 0.68 (0.49 to 0.94)*   | 2.02 (1.97 to 2.07)*** |
| Tertiary                                      | 685,483 (69) | 2.2 (2.14 to 2.26)***  | 2.09 (2.04 to 2.15)*** | 0.68 (0.5 to 0.92)*    |
| Accepting Medical Center (Primary comparator) |              |                        |                        |                        |
| Primary                                       | 29,622 (3)   |                        |                        |                        |
| Secondary                                     | 59,672 (6)   | Std Dev=0.79           | Std Dev=0.88           | Std Dev=0.97           |
| Tertiary                                      | 898,203 (91) |                        |                        |                        |

Abbreviations: N, number of registrants; HR, hazard ratio; CI, confidence interval; Std Dev, standard deviation.

†Results are from mixed-effects Cox proportional hazard models with Health Service & Accepting Medical Center included as a crossed random effect.

\*\*\*Significant at the 0.1% level, \*\* Significant at the 1% level, \*Significant at the 5% level.

**Correlation Analysis by Level of Care**

It might be possible the positive correlation we found between waiting variability and mortality is overestimated due to the inclusion of all medical center types (primary, secondary, and tertiary) into the correlation analysis discussed in the main manuscript. Here, we investigate the association between waiting and mortality further by focusing only in primary care centers. Figure S3 shows no strong positive correlation between center-specific mortality risk and waiting time performance for secondary and tertiary medical centers.

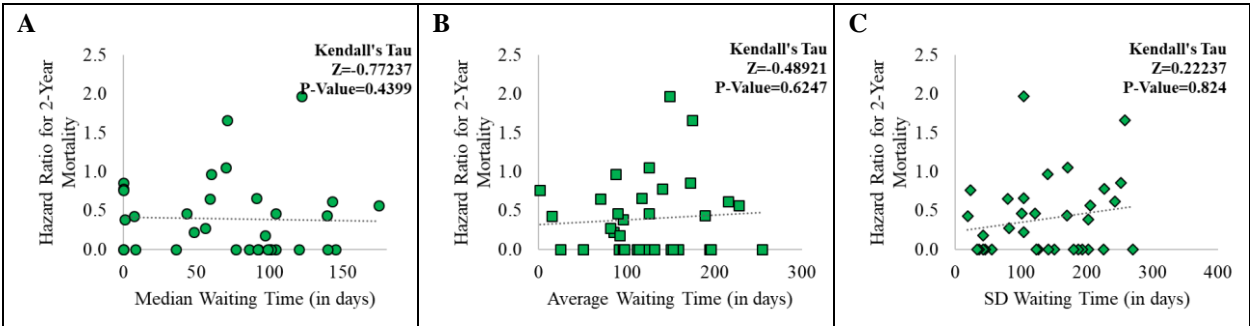

**Figure S3. Association between primary medical center-specific hazard ratio (HR) for death and primary care center-specific waiting time performance (Panel A, median waiting time against HR; Panel B, average waiting time against HR; Panel C, standard deviation of waiting time against HR). Kendall rank correlation coefficient measured no statistically significant association between the medical centers' waiting times and the medical centers' HR for death. Medical centers with <30 patients in their waiting lists during the study timeframe were excluded from the analyses. Abbreviations: SD, standard deviation.**

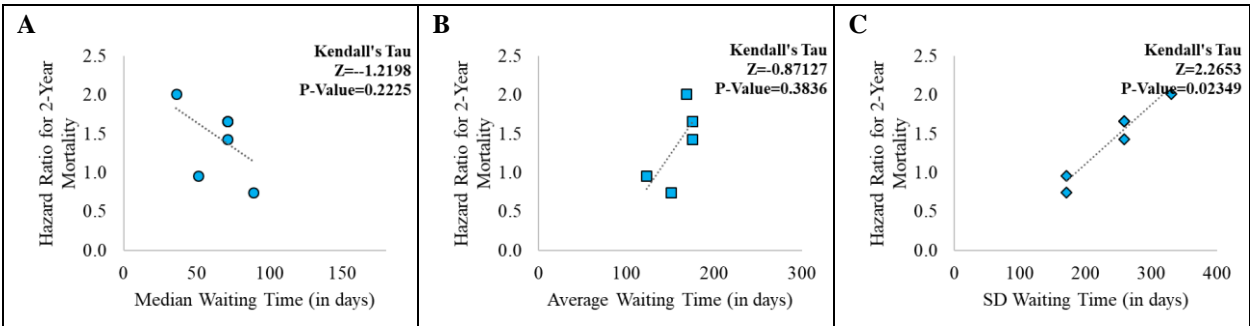

**Figure S3. Association between secondary and tertiary medical center-specific hazard ratio (HR) for death and medical center-specific waiting time performance (Panel A, median waiting time against HR; Panel B, average waiting time against HR; Panel C, standard deviation of waiting time against HR). Kendall rank correlation coefficient measured no statistically significant association between the medical centers' median and average waiting times and the medical centers' HR for death (Panel A and B). The same examination found a statistically significant positive correlation between the medical centers' standard deviation of waiting time and the medical centers' HR for death (Panel C). Medical centers with <30 patients in their waiting lists during the study timeframe were excluded from the analyses. Abbreviations: SD, standard deviation.**

**Correlation Analysis for High-Risk Medical Specialties**

It might be possible that the positive correlation we found between waiting variability and mortality is underestimated due to the inclusion of all medical specialties. Here, we investigate the association between center-specific waiting and mortality focusing only in high-risk specialties (mortality rate over 50<sup>th</sup> percentile). As presented in Figure S4, for the subset of high mortality and high waiting time variability specialties, we found a strong positive correlation between waiting time and mortality.

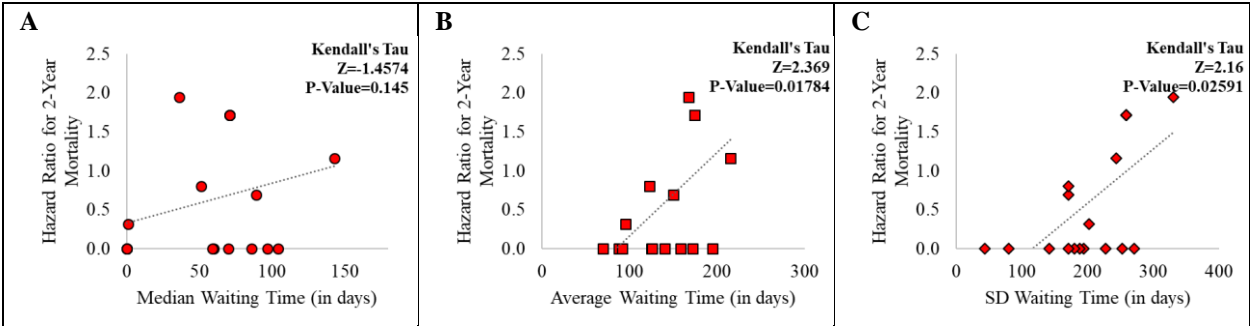

**Figure S4. Association between medical center-specific hazard ratio (HR) for death and medical center-specific waiting time performance (Panel A, median waiting time against HR; Panel B, average waiting time against HR; Panel C, standard deviation of waiting time against HR). Kendall rank correlation coefficient measured statistically significant associations between the medical centers' waiting time performance and mortality risk. Medical centers with <30 patients in their waiting lists during the study timeframe were excluded from the analyses. Abbreviations: SD, standard deviation.**

## EXTENSIONS TO MAIN ANALYSIS

### Methodological Justification of The Selected Study Design

The availability of each patient's waiting time could be used to study the association between waiting and death for patients not prioritized by the GES Act. However, such study design is problematic due to unobserved health status differences that are likely to confound our attempts to measure the effect of waiting on mortality. In initial data explorations presented in Table S4, we found patients who died had consistently shorter wait times, which can be explained by subconscious triage effect. To isolate the effect of waiting on mortality, we therefore measured the association at the medical center level. We calculate a mortality risk associated to each medical center, and then we measured the association between these mortality risks with the respective waiting time performance of each medical center. The results of the proposed medical center-specific analyses are presented in the main manuscript.

**Table S4. Distribution of waiting times by specialty and mortality status**

| Specialty                          | Median Waiting Time   |       | P-Value†             |
|------------------------------------|-----------------------|-------|----------------------|
|                                    | Dead within two years | Alive |                      |
| Internal Medicine                  | 37                    | 13    | <0.0001              |
| Adult Surgery                      | 45                    | 77    | <0.0001              |
| Anesthesiology                     | 21                    | 21    | 0.7731               |
| Breast Surgery                     | 14                    | 37    | 0.000933             |
| Bronchopulmonary                   | 27                    | 25    | 0.0148               |
| Cardiology                         | 56                    | 61    | <0.0001              |
| Cardiovascular Surgery             | 78                    | 205.5 | <0.0001              |
| Dentistry                          | 142                   | 129   | 0.2984               |
| Dermatology                        | 40                    | 47    | 0.0092               |
| Endocrinology                      | 41                    | 51    | 0.0013               |
| Family Medicine                    | 25                    | 55    | NA (sample size = 1) |
| Gastroenterology                   | 50                    | 71    | <0.0001              |
| Genetics                           | 51                    | 84    | 0.0024               |
| Hematology                         | 21                    | 21    | 0.2330               |
| Infectious Disease                 | 37                    | 13    | <0.0001              |
| Maxillofacial Surgery              | 34                    | 50    | <0.0001              |
| Neonatology                        | 19                    | 29    | 0.2379               |
| Nephrology                         | 78                    | 60    | 0.0018               |
| Neurology                          | 94                    | 76    | 0.4240               |
| Neurosurgery                       | 36                    | 36    | 0.1309               |
| Nutrition                          | 34                    | 31    | 0.1607               |
| Obstetrics & Gynecology            | 31                    | 41    | <0.0001              |
| Oncology                           | 17                    | 22    | <0.0001              |
| Ophthalmology                      | 103                   | 97    | 0.0245               |
| Other                              | 65                    | 108   | 0.3403               |
| Otorhinolaryngology                | 67.5                  | 80    | <0.0001              |
| Pediatrics                         | 51                    | 35    | 0.3243               |
| Physical Medicine & Rehabilitation | 32                    | 39    | <0.0001              |
| Plastic Surgery                    | 35.5                  | 49    | 0.0554               |
| Colorectal Surgery                 | 33                    | 50    | <0.0001              |
| Psychiatry                         | 45                    | 49    | 0.0438               |
| Rheumatology                       | 43                    | 42    | 0.8913               |
| Sexual Transmitted Disease         | 104.5                 | 58    | 0.3558               |
| Traumatology                       | 45                    | 51    | <0.0001              |
| Urology                            | 42                    | 82    | <0.0001              |

†Results are from Wilcoxon rank sum test with continuity correction

**EXTRA DATA VISUALIZATIONS**

**Age- and Sex-Adjusted Mortality Rate**

Age-adjusted and sex-adjusted mortality rates for our non-GES new specialty waitlist and each specific age cohort are presented in Figure S5, Figure S6, and Figure S7.

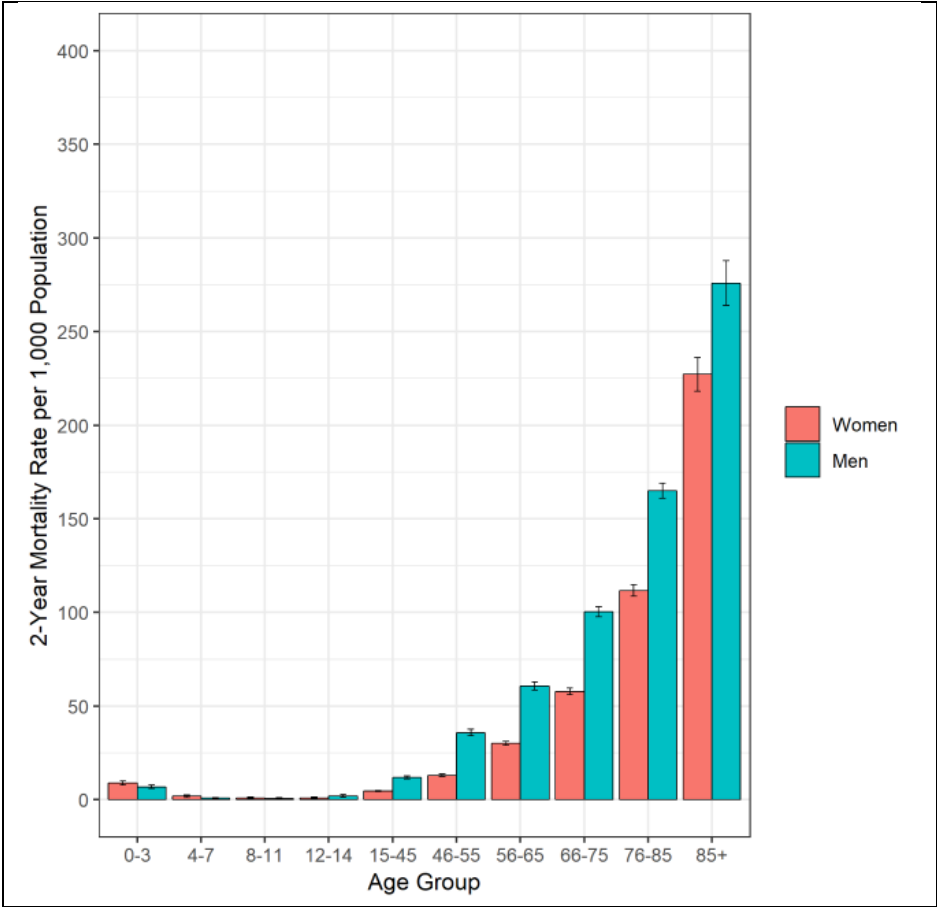

**Figure S5. 2-year crude death rate by sex and age-groups in the non-GES waitlist for new specialty: Atacama, Valparaiso-San Antonio, and Osorno, 2008-2017. Error bars indicate 95% confidence intervals.**

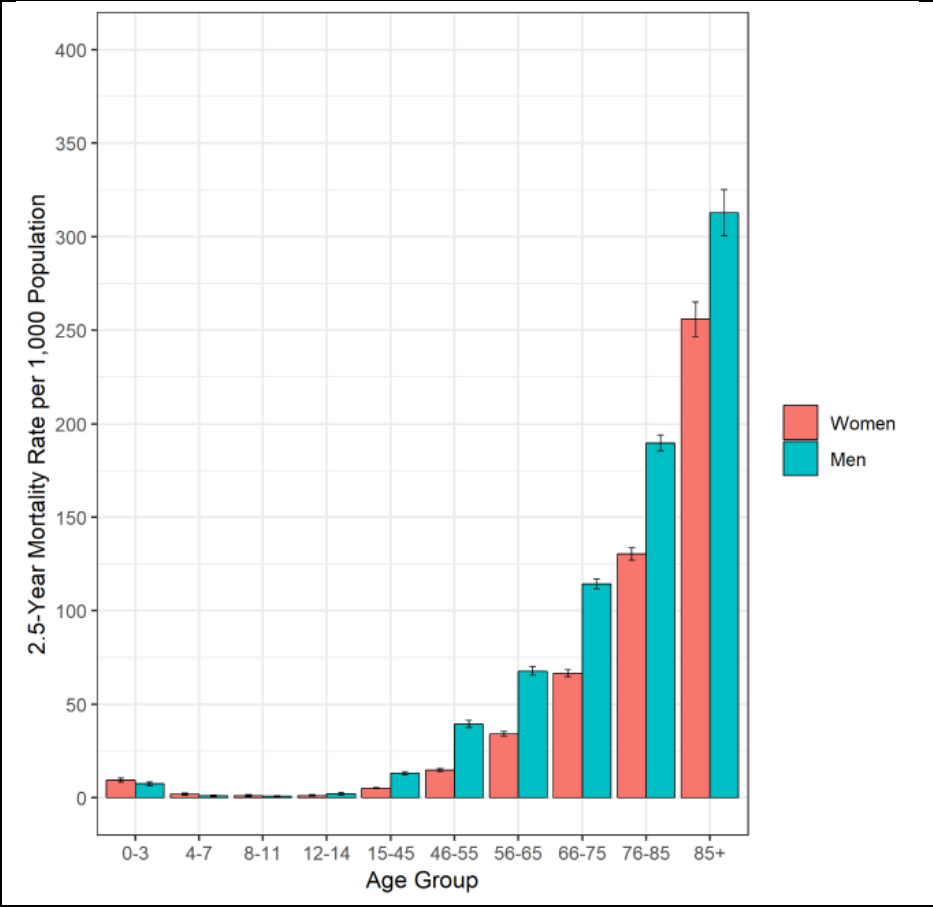

**Figure S6. 2.5-year crude death rate by sex and age-groups in the non-GES waitlist for new specialty: Atacama, Valparaiso-San Antonio, and Osorno, 2008-2017. Error bars indicate 95% confidence intervals.**

1

2

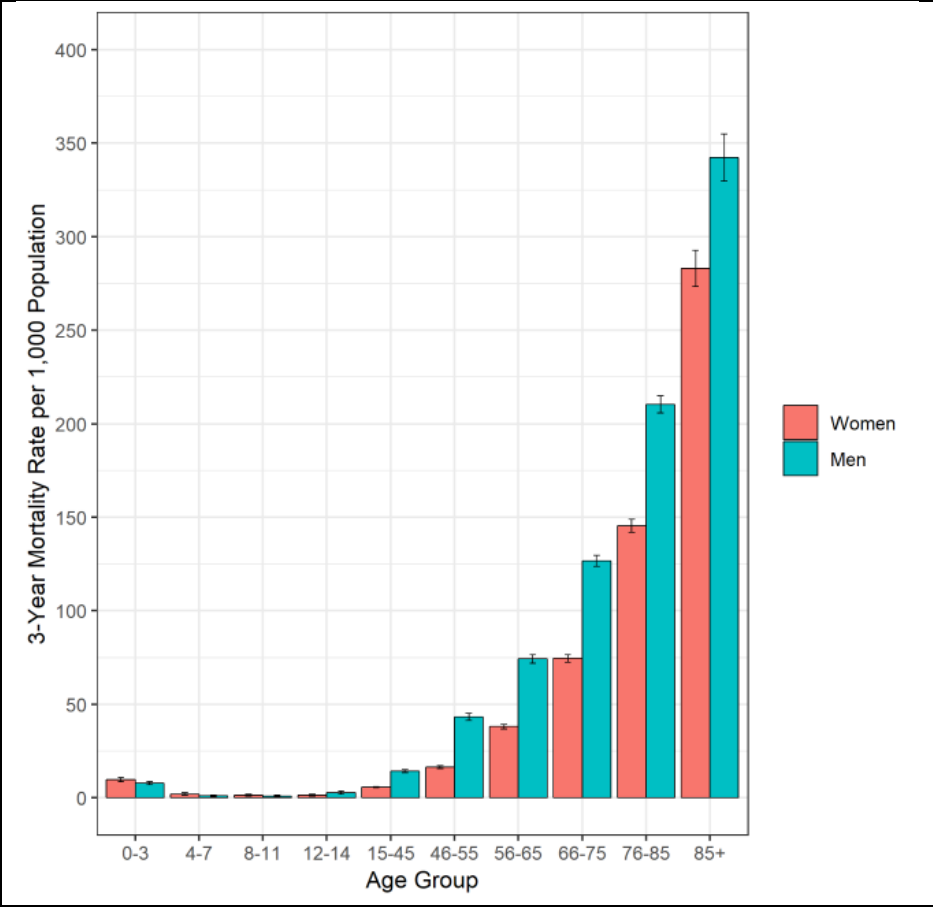

**Figure S7. 3-year crude death rate by sex and age-groups in the non-GES waitlist for new specialty: Atacama, Valparaiso-San Antonio, and Osorno, 2008-2017. Error bars indicate 95% confidence intervals.**

1

2

**Specialty- and Sex-Adjusted Mortality Rates**

Age-adjusted and sex-adjusted mortality rates for our non-GES new specialty waitlist and each specific age cohort are presented in Figure S8.

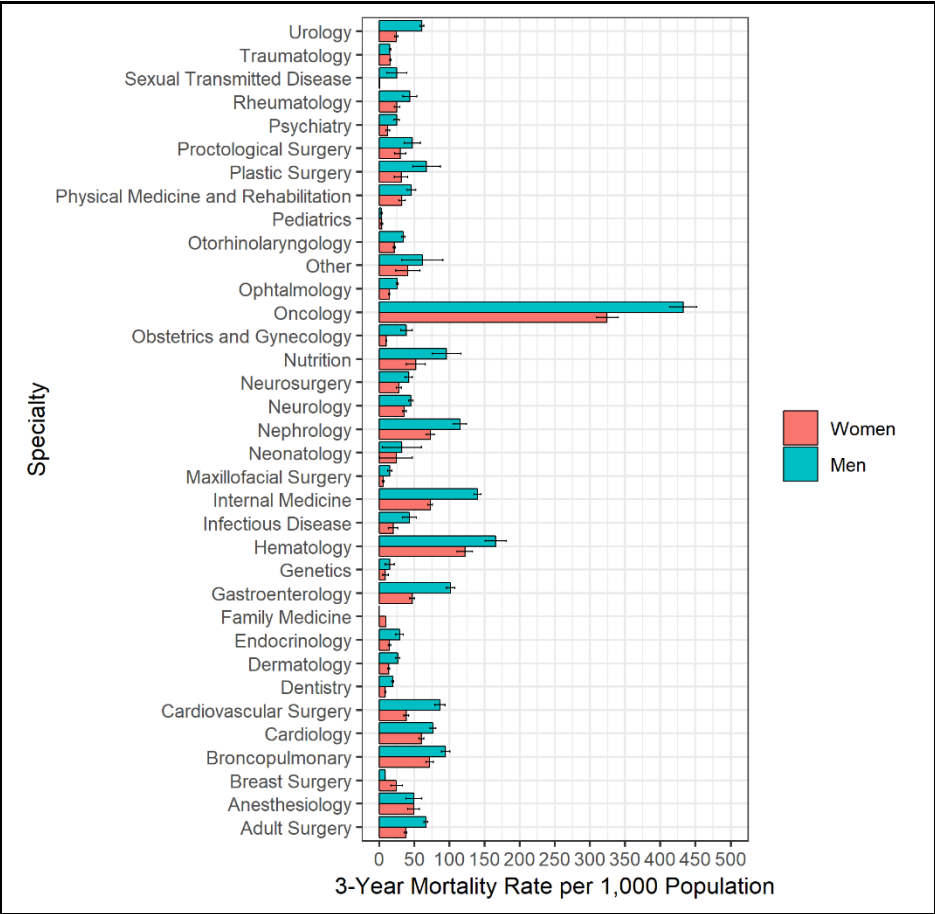

**Figure S8. 2-year crude death rate by specialty and age-groups in the non-GES waitlist for new specialty: Atacama, Valparaiso-San Antonio, and Osorno, 2008-2017. Error bars indicate 95% confidence intervals.**

**Death-Adjusted Waiting Time Distribution**

Death-adjusted waiting times for our non-GES new specialty waitlist are presented in Figure S9, S10, and S11.

**Figure S9. Probability density estimation of the waiting time by 2-year death status for the non-GES waitlist for new specialty: Atacama, Valparaiso-San Antonio, and Osorno, 2008-2017.**

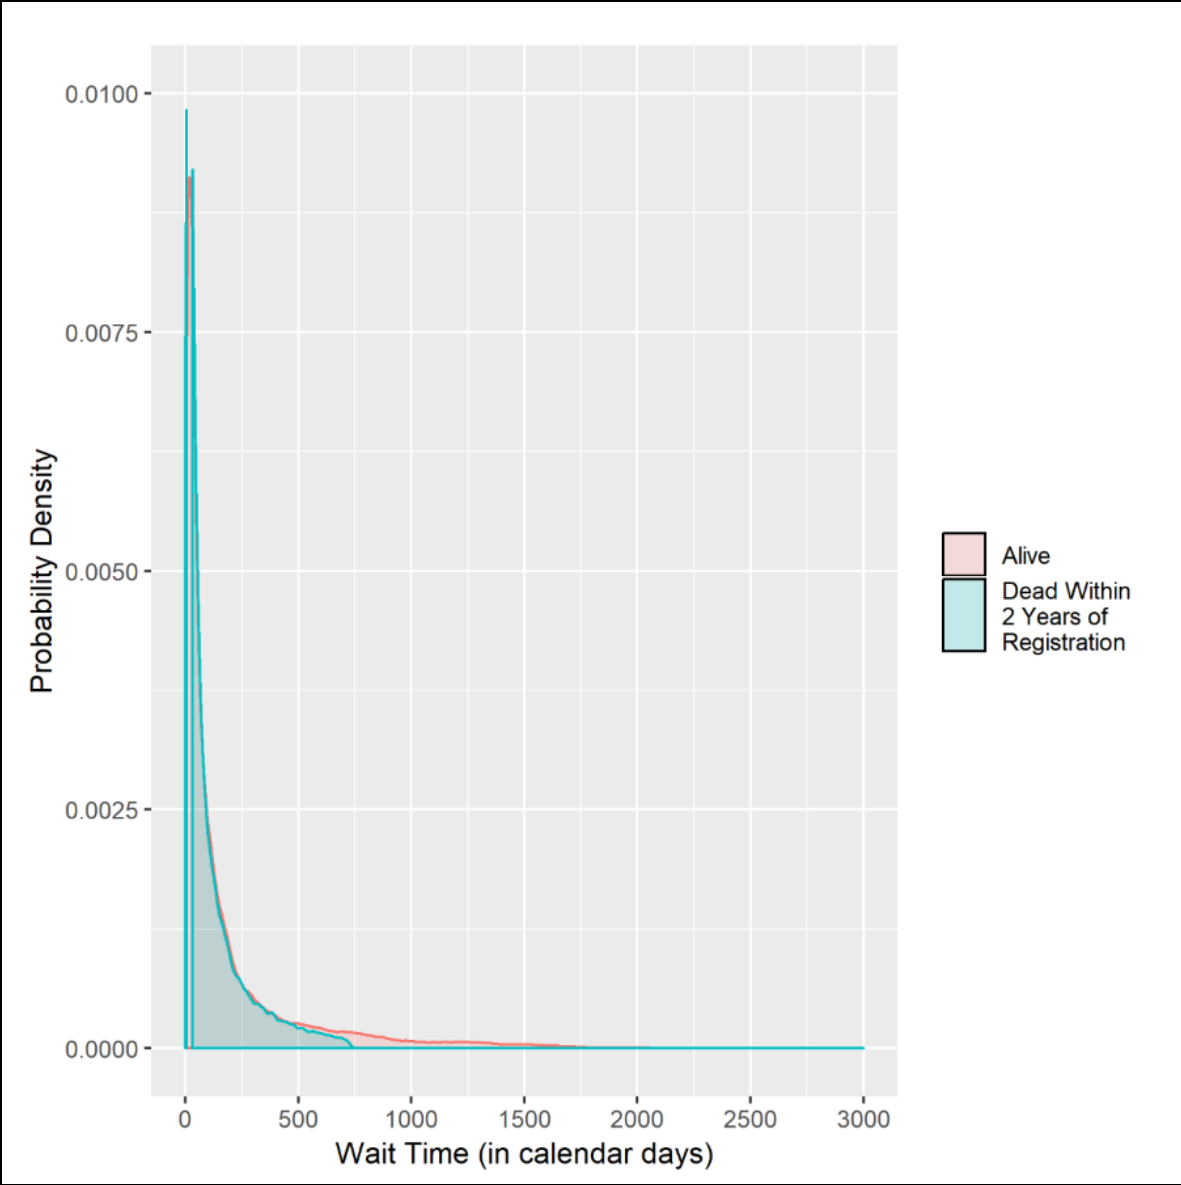

1

**Figure S10. Probability density estimation of the waiting time by 2.5-year death status for the non-  
GES waitlist for new specialty: Atacama, Valparaiso-San Antonio, and Osorno, 2008-2017.**

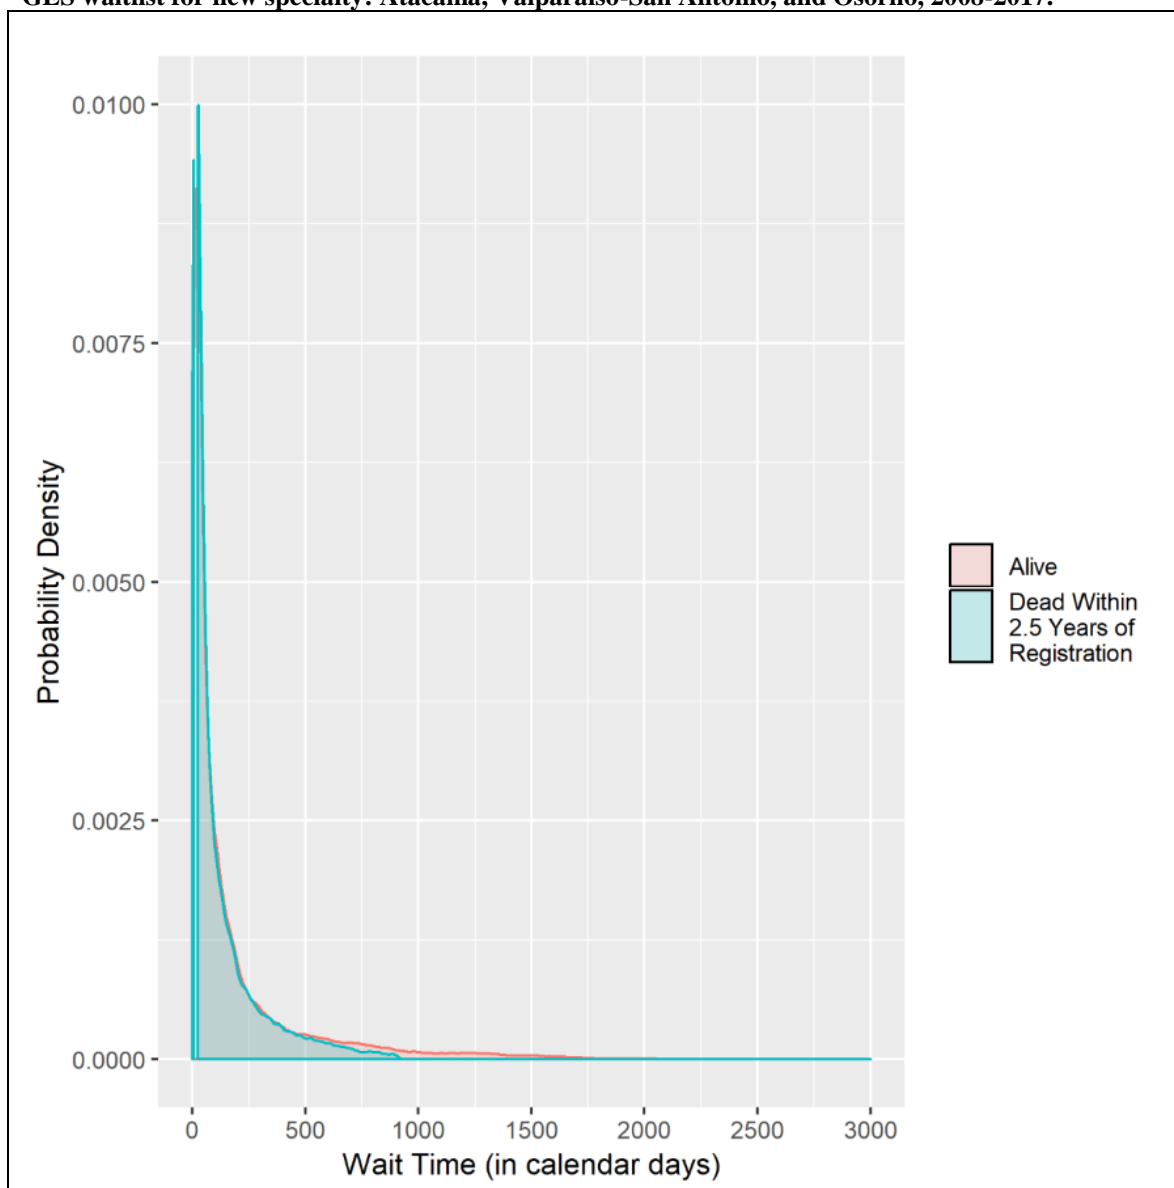

2

3

**Figure S11. Probability density estimation of the waiting time by 3-year death status for the non-GES waitlist for new specialty: Atacama, Valparaiso-San Antonio, and Osorno, 2008-2017.**

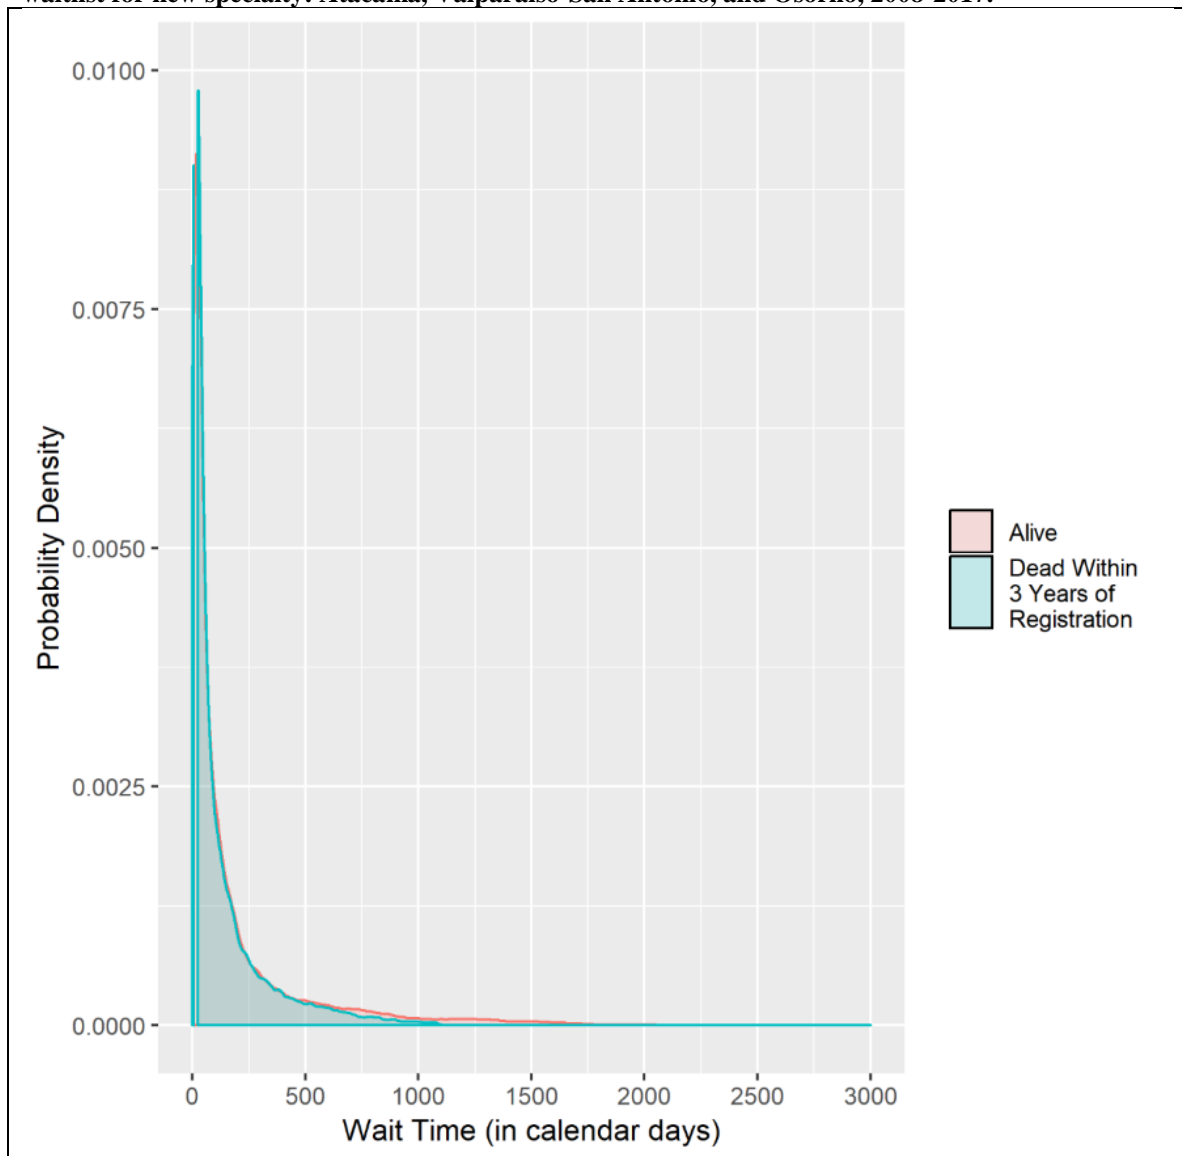

1 **POLICY TIMELINE**  
 2 **Health Problems Prioritized by the GES Act**

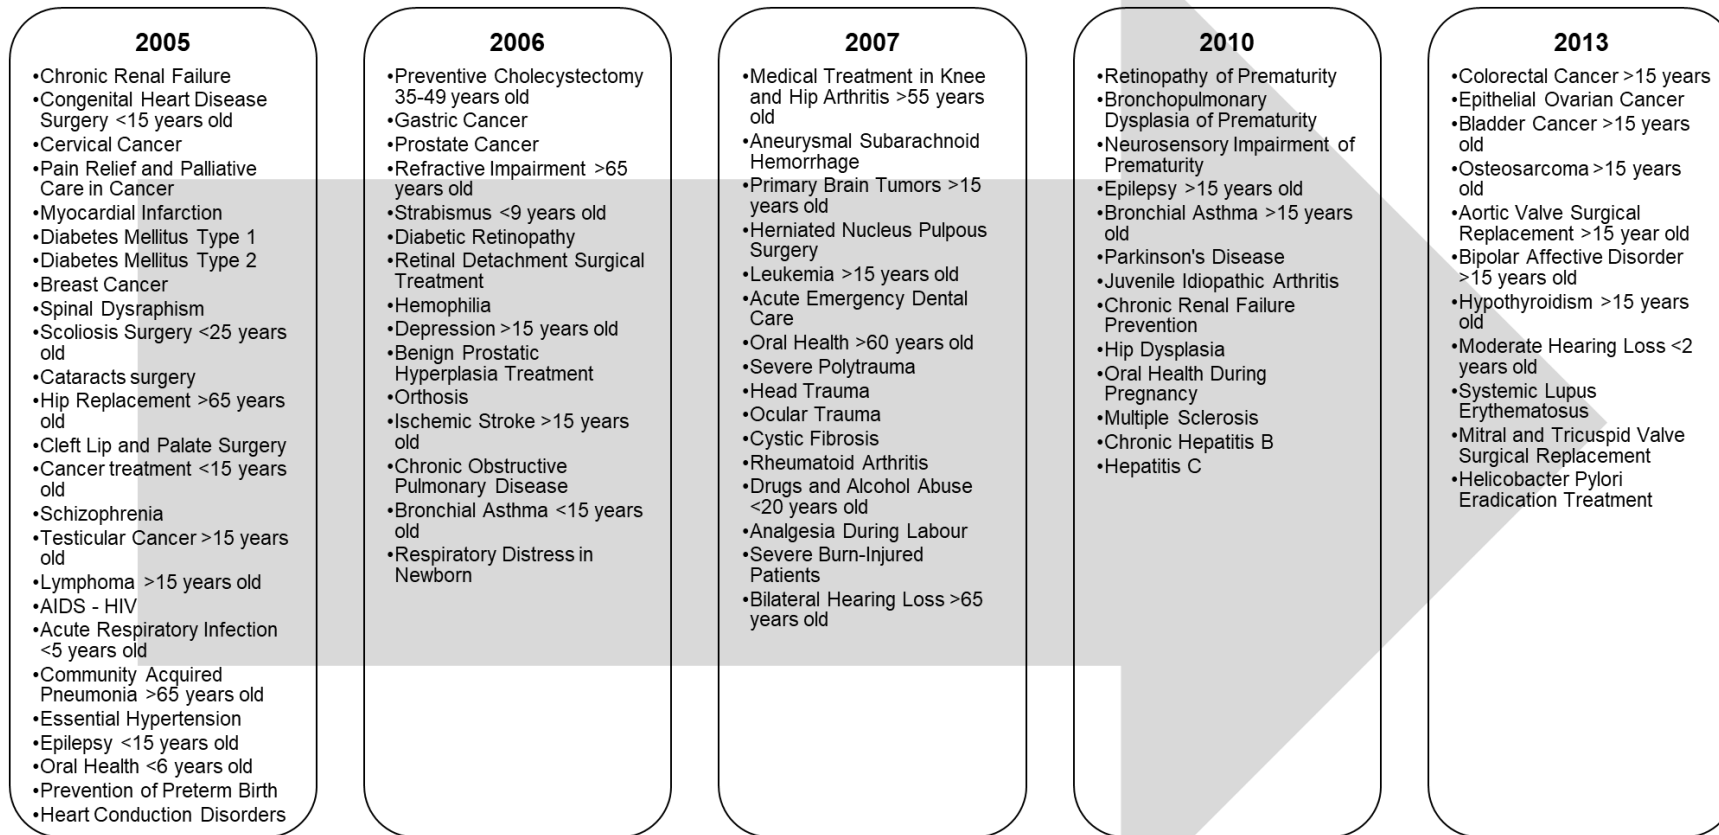

**Figure S12. List of health problems prioritized the GES Act.**

## DATA COLLECTION AND ANALYSIS

Our group requested the non-GES new specialty waiting list data by means of the Chile Transparency Act on March 15, 2018. We requested patient-level data to all 33 Chilean Regional Health Services (RHS) through the Transparency Law website (<https://portaltransparencia.cl/PortalPdT/>). Our data request included:

- A masked unique identifier for each registrant,
- Date of birth,
- Sex,
- Type of health coverage,
- Type of service,
- Location of healthcare entity that creates the referral,
- Is the entity that creates the referral is a rural area?
- Location of healthcare entity where patient is referred,
- Specialty where the patient is referred,
- Waiting list input date,
- Waiting list output date,
- Reason for output from the waiting list,
- PRAIS coverage status,
- Suspected diagnosis,
- Confirmed diagnosis,
- Appointment date,
- Attendance to appointment status,
- Date of death,
- Alert, and
- Reason of the alert.

Out of the 33 requests, three RHS sent the requested datasets (Atacama, Valparaíso-San Antonio, and Osorno), three RHS sent datasets with data elements that were different from our original request, and the remaining 27 RHS either rejected the request or asked for an extension. Therefore, our analyses were based on the datasets shared by the RHS of Atacama, Valparaíso-San Antonio, and Osorno. The request codes assigned by the Transparency Law website are AO019T0000319 for Atacama, AO022T0000406 for Valparaíso-San Antonio, and AO034T0000266 for Osorno. Figure S13 depicts waitlist registrants collected and reasons for exclusion.

**Figure S13. Registrant selection in the study of non-GES waitlist for new specialty: Atacama, Valparaíso, and Osorno, 2008-2017.**

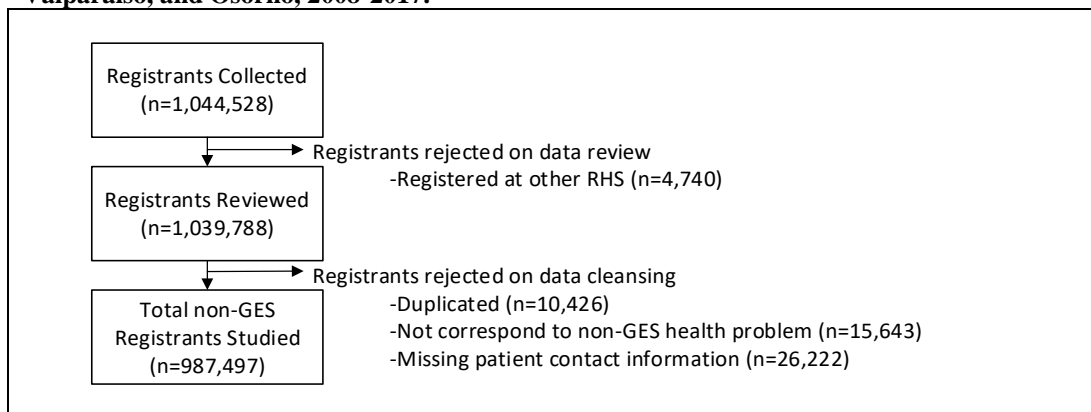

| <b>Table S5. Structure of the study sample</b> |                        |                           |                      |                       |
|------------------------------------------------|------------------------|---------------------------|----------------------|-----------------------|
| <b>Year</b>                                    | <b>Number of Cases</b> | <b>Number of Response</b> | <b>Response Rate</b> | <b>Attrition Rate</b> |
| 2008                                           | 14,344                 | 13,616                    | 94.92%               | 5.08%                 |
| 2009                                           | 34,487                 | 34,274                    | 99.38%               | 0.62%                 |
| 2010                                           | 83,604                 | 78,320                    | 93.68%               | 6.32%                 |
| 2011                                           | 146,839                | 140,131                   | 95.43%               | 4.57%                 |
| 2012                                           | 127,089                | 120,408                   | 94.74%               | 5.26%                 |
| 2013                                           | 119,317                | 113,882                   | 95.44%               | 4.56%                 |
| 2014                                           | 124,307                | 120,613                   | 97.03%               | 2.97%                 |
| 2015                                           | 139,651                | 134,729                   | 96.48%               | 3.52%                 |
| 2016                                           | 140,451                | 135,482                   | 96.46%               | 3.54%                 |
| 2017                                           | 99,273                 | 96,042                    | 96.75%               | 3.25%                 |
| <b>Overall</b>                                 | <b>1,029,362</b>       | <b>987,497</b>            | <b>95.93%</b>        | <b>4.07%</b>          |

1
